# Supplementary material for: Stimulus strength determines the BTK-dependence of the SHIP1-deficient phenotype in IgE/antigen-triggered mast cells
Source: PubMed Central journal article supplement (PMC6195619; doi:10.1038/s41598-018-33769-1), 2018-10-19
Supplement: 41598_2018_33769_MOESM1_ESM.pdf [file 41598_2018_33769_MOESM1_ESM.pdf]

Supplementary information

## Stimulus strength determines the BTK-dependence of the SHIP1-deficient phenotype in IgE/antigen-triggered mast cells

**Carolin N. Zorn, Anne Simonowski, and Michael Huber<sup>1</sup>**

Institute of Biochemistry and Molecular Immunology, University Clinic, RWTH Aachen University, Pauwelsstraße 30, 52074 Aachen, Germany

<sup>1</sup> Corresponding author: Dr. Michael Huber (PhD)

Institute of Biochemistry and Molecular Immunology

RWTH Aachen University

Pauwelsstr. 30, 52074 Aachen, Germany

Tel: ++49-241-8088830; Fax: ++49-241-8082428

E-mail: [mhuber@ukaachen.de](mailto:mhuber@ukaachen.de)

## Supplementary Figure S1

*Illustration of the sequence homology between the TEC family kinases BTK, TEC, ITK, and TXK.*

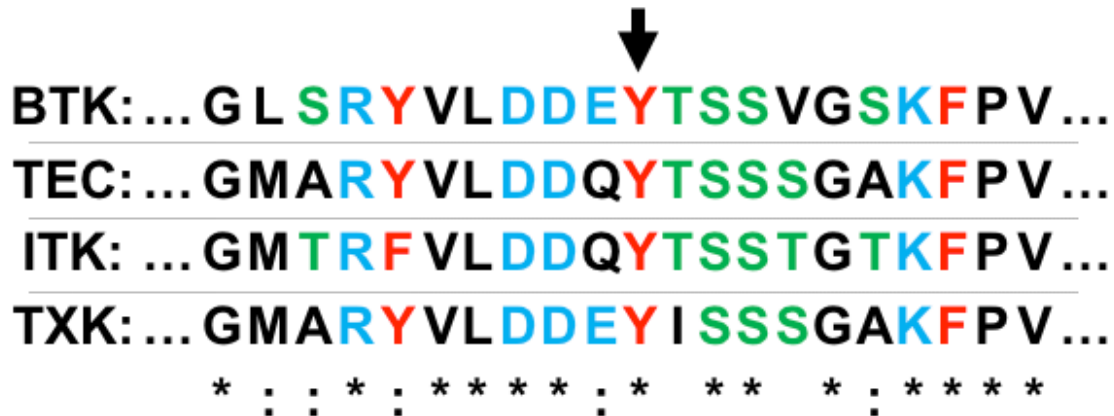

Amino acid sequences of the murine TEC family kinases BTK, TEC, ITK, and TXK were aligned using the online tool Clustal Omega ([www.clustal.org/omega/](http://www.clustal.org/omega/)). The arrow depicts the Y residues in the respective kinase domains necessary for activation of the TEC family kinases (BTK, Y551; TEC, Y518; ITK, Y517; TXK, Y420). Shown are ten amino acids N-terminal and C-terminal of this activating Y residue. Aromatic amino acids are coloured in red, charged amino acids in blue, and S/T residues in green. The degree of conservation is indicated by the following signs (gradation: \* > : > blank).

## Supplementary Figure S2

Comparable expression of mast cell surface markers on WT, *Btk*<sup>-/-</sup>, *Ship1*<sup>-/-</sup>, and DKO BMMCs.

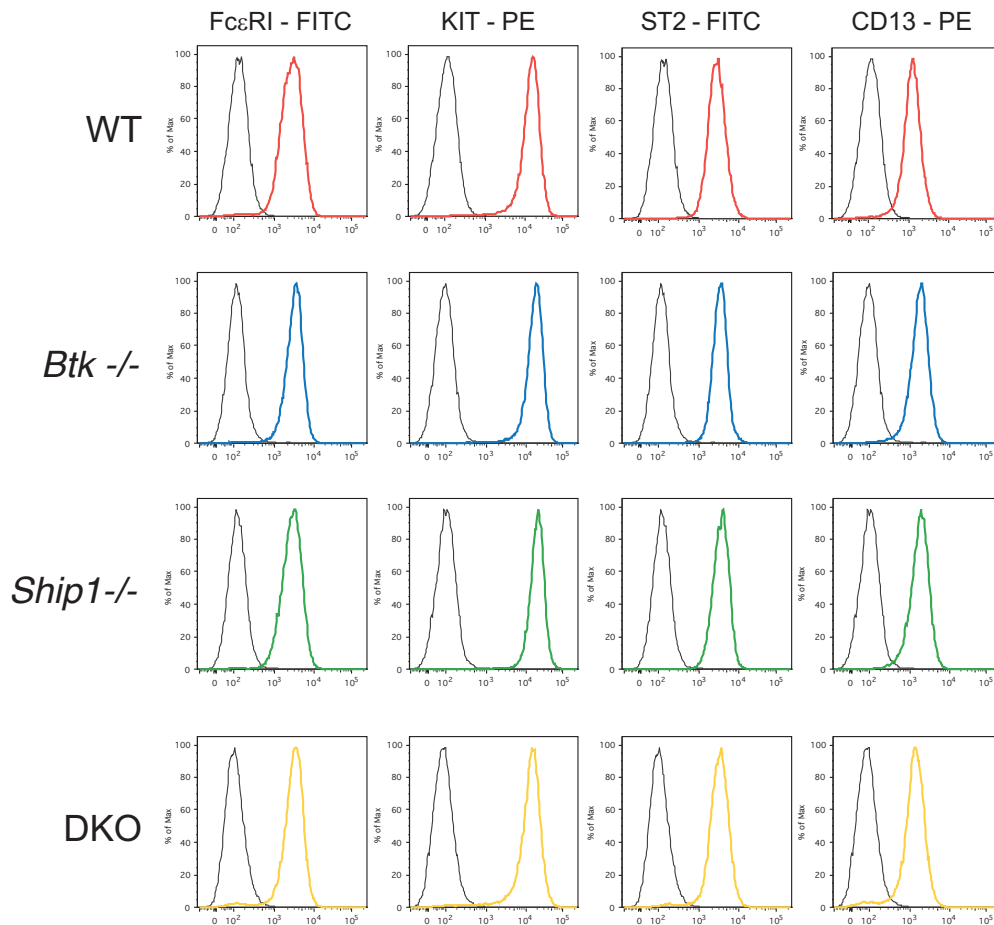

WT (red), *Btk*<sup>-/-</sup> (blue), *Ship1*<sup>-/-</sup> (green), and DKO (yellow) BMMCs were analysed for the differentiation state with FITC-conjugated anti-FcεRI alpha, PE-conjugated anti-KIT, FITC-conjugated anti-ST2, and PE-conjugated anti-CD13 antibodies in a FACS Canto II (BD Biosciences). Comparable results were obtained with cells from different MC cultures. (n = 4)

## Supplementary Figure S3

*Complete inhibition of degranulation in Ship1<sup>-/-</sup> BMMCs requires higher concentrations of Ibrutinib than in WT BMMCs.*

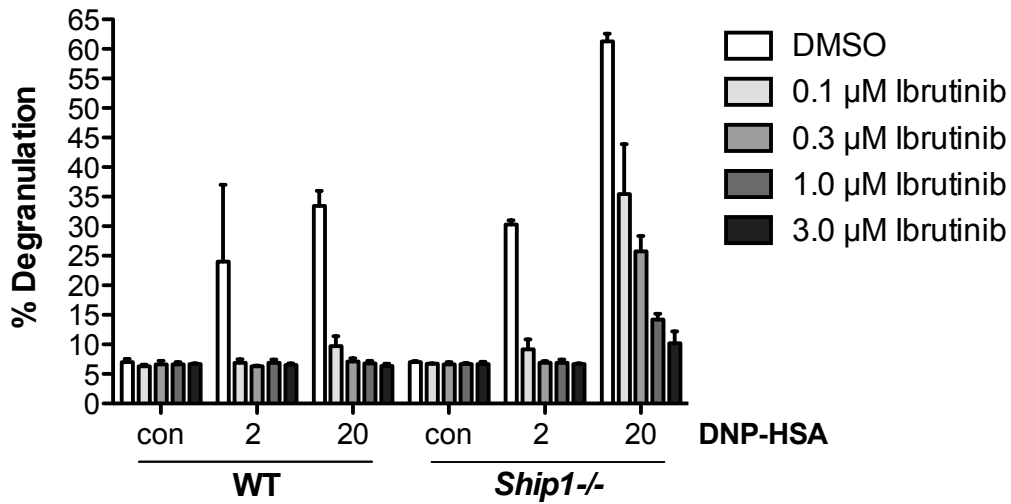

WT and *Ship1<sup>-/-</sup>* BMMCs were preloaded overnight with 0.15 μg/ml DNP-specific monoclonal IgE (SPE-7). The cells were pretreated with 0.1, 0.3, 1.0, and 3.0 μM Ibrutinib for 30 min at 37 °C before stimulation. Following, the cells were left untreated (con) or stimulated with 2 and 20 ng/ml Ag (DNP-HSA) for degranulation and the amount of released β-hexosaminidase was determined. Each bar is the mean of triplicates ± SD; n = 2.
